# Supplementary material for: Nlgn4 knockout induces network hypo-excitability in juvenile mouse somatosensory cortex in vitro
Source: PubMed Central journal article supplement — Sci Rep. 2013 Oct 9;3:2897. doi: 10.1038/srep02897 (PMC3793213; doi:10.1038/srep02897), 2013-10-09

Title

***Nlgn4* knockout induces network hypo-excitability in juvenile mouse somatosensory cortex *in vitro*.**

Authors

V. Delattre, D. La Mendola, J. Meystre, H. Markram and K. Markram\*

Affiliation

Laboratory of Neural Microcircuitry, Brain Mind Institute, Ecole Polytechnique Fédérale de  
Lausanne, Switzerland

\*Correspondence to: [kamila.markram@epfl.ch](mailto:kamila.markram@epfl.ch)

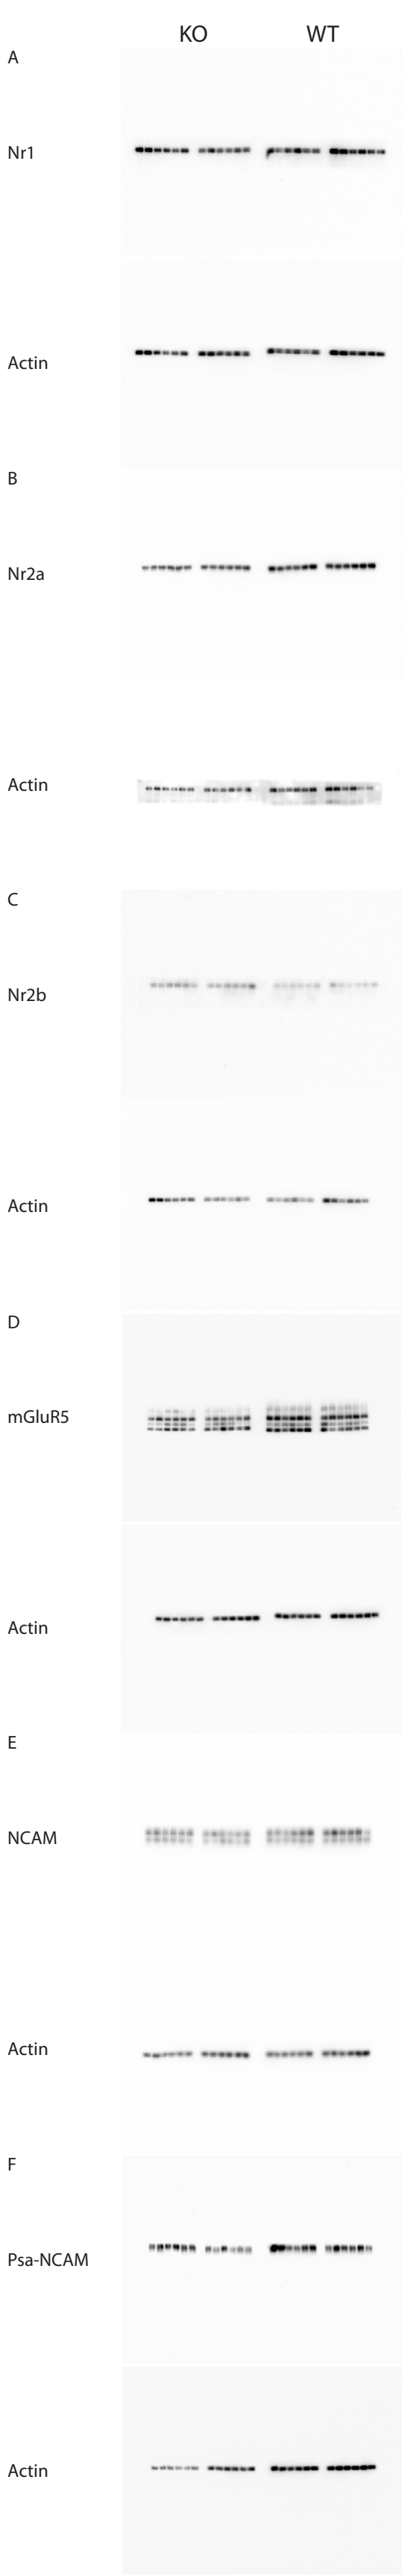

Supplement: srep02897-s1.pdf [file srep02897-s1.pdf]
